# Supplementary material for: Rho-associated kinase regulates Langerhans cell morphology and responsiveness to tissue damage
Source: PubMed Central journal article supplement — bioRxiv. 2023 Jul 29:2023.07.28.550974. Preprint. [Version 1] doi: 10.1101/2023.07.28.550974 (PMC10402157; doi:10.1101/2023.07.28.550974), 2023-07-29
Supplement: NIHPP2023.07.28.550974v1-supplement-10.pdf [file NIHPP2023.07.28.550974v1-supplement-10.pdf]

582 SUPPLEMENTAL FIGURES

583

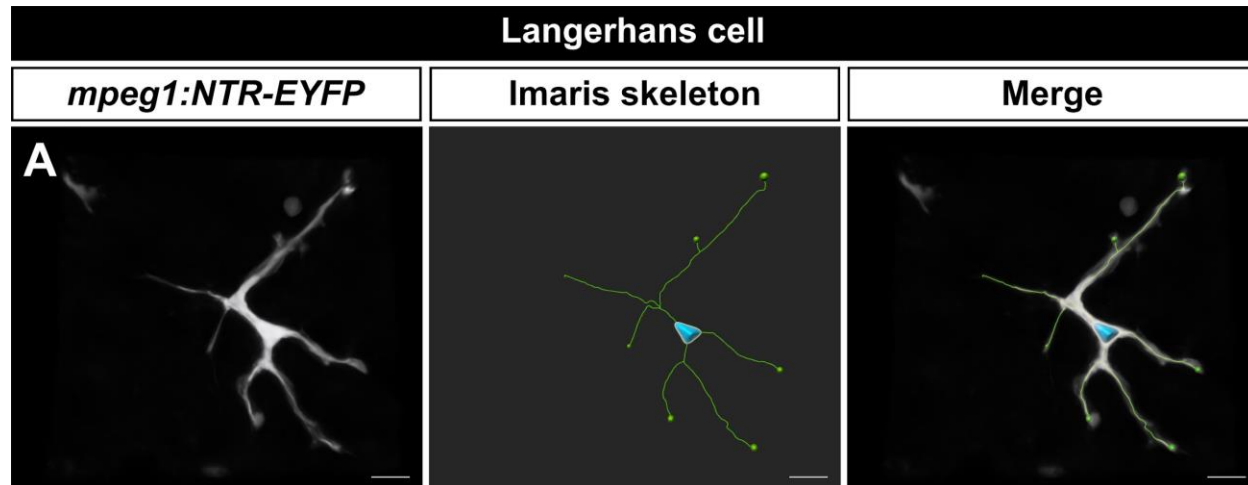

584

585 **Supplemental Figure 1. Skeletonization of a Langerhans cell. A.** Representative image of *Tg(mpeg1:NTR-EYFP)*  
586 skeletonized using Imaris Filaments module. See also Supplemental Video 1. Scale bar in **(A)** denotes 10 microns.

587

588

589

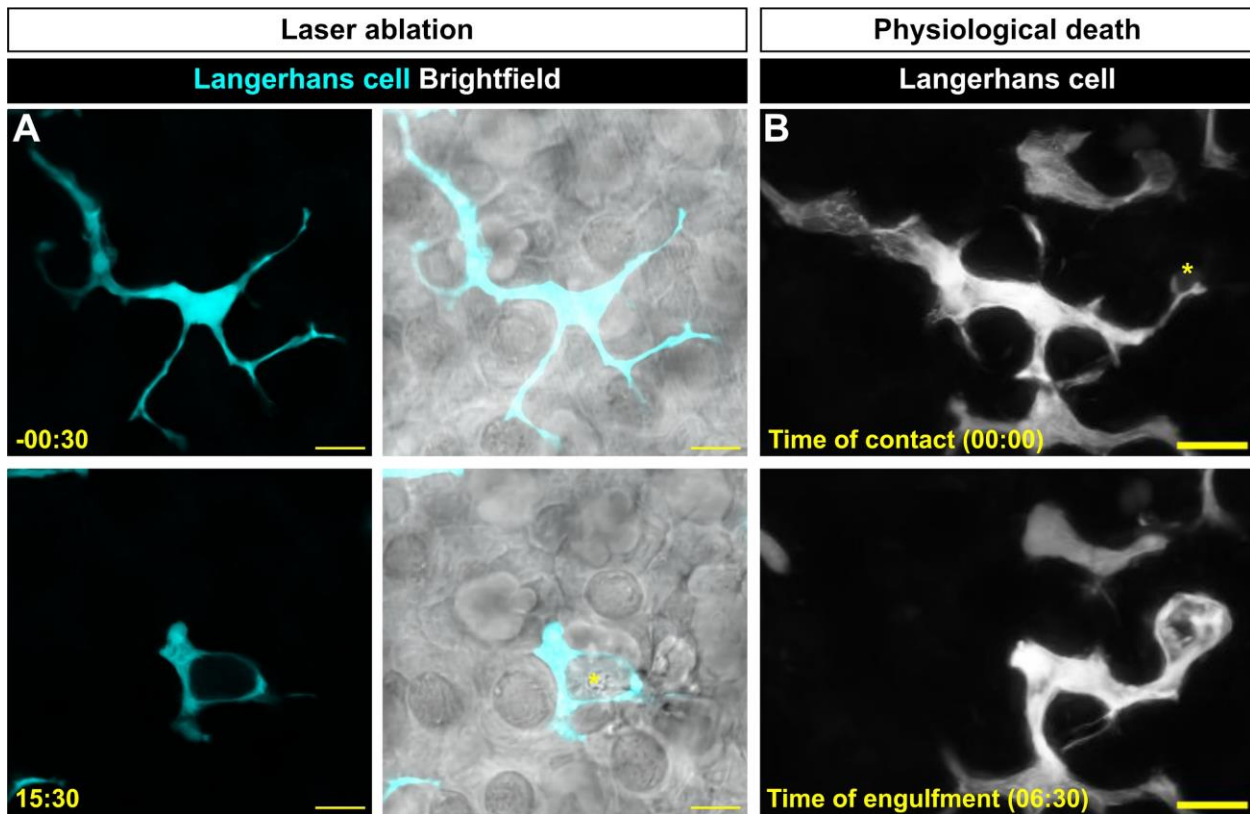

590  
591  
592  
593  
594  
595

**Supplemental Figure 2. Langerhans cells undergo shape changes during engulfment of large cellular debris.**  
**A.** Stills of *Tg(mpeg1:NTR-EYFP)*-positive Langerhans cell showing fluorescent only (left) and fluorescent+brightfield composite (right) images before and after laser ablation. Asterisk depicts location of laser ablation. **B.** Stills of *Tg(mpeg1:NTR-EYFP)* showing “natural” engulfment of large debris in the absence of laser ablation. Asterisk depicts future site of phagocytosis. Timestamps denote mm:ss. Scale bars denote 10 microns.

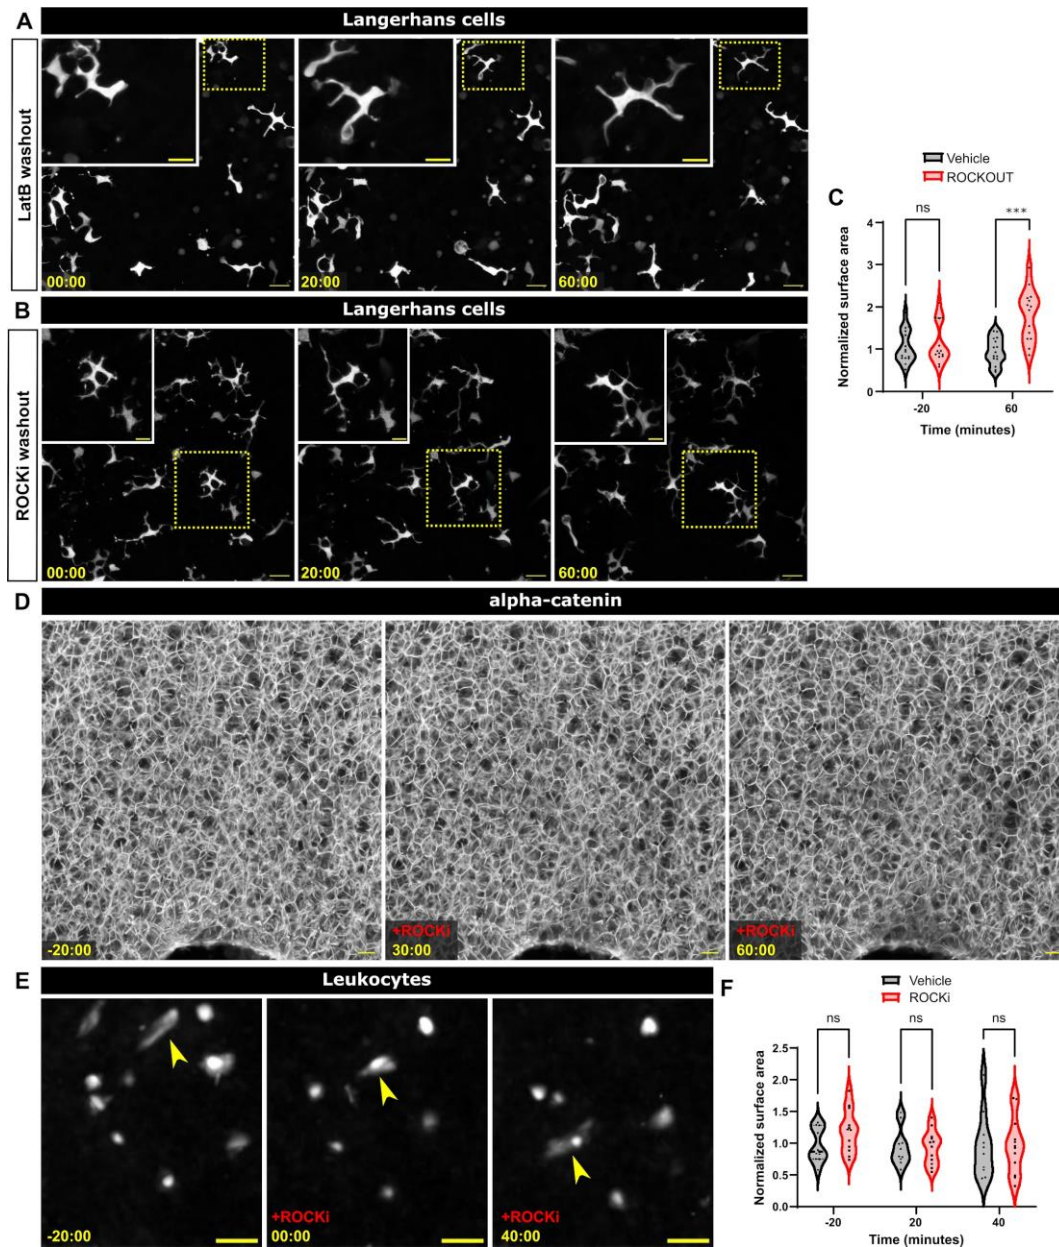

596  
597  
598  
599  
600  
601  
602  
603  
604  
605  
606  
607  
608  
609  
610

**Supplemental Figure 3. Effects of LatB and ROCK inhibition of Langerhans cells.** **A.** Stills of *Tg(mpeg1:NTR-EYFP)*-positive Langerhans cells depicting normal cell motility after LatB washout. **B.** Stills of *Tg(mpeg1:NTR-EYFP)*-positive Langerhans cells depicting normal cell motility after Y-27632 washout. Dotted boxes in **(A,B)** denote regions magnified in insets. **C.** Quantification of surface area covered after ROCKOUT treatment, an alternative inhibitor of ROCK. Data shown are compiled from two individual experiments,  $n = 15$  cells from  $N = 6$  scales for vehicle treatment and  $n = 14$  from  $N = 5$  scales for ROCKOUT treatment. **D.** Stills of *Gt(ctnna1-Citrine)*-positive cells depicting normal tissue morphology after ROCK inhibition. **E.** Stills of *Tg(lck:lck-GFP)*-positive leukocytes showing no changes in cell morphology after ROCK inhibition. **F.** Violin plots of surface area covered by *Tg(lck:lck-GFP)*-positive cells after ROCKi. Data shown are compiled from two individual experiments,  $n = 10$  cells from  $N = 5$  scales for vehicle treatment and  $n = 12$  from  $N = 4$  scales for ROCKi treatment. \*\*\* =  $p < 0.0001$ . Mann-Whitney U tests were used to determine significance between groups at each time point in **(C)**. Two-way ANOVA followed by Bonferroni correction was used in **(F)**. Timestamps denote mm:ss. Scale bars in **(A, B, D)** denote 20 microns, scale bars in **(A, inset; B, inset; E)** denote 10 microns.

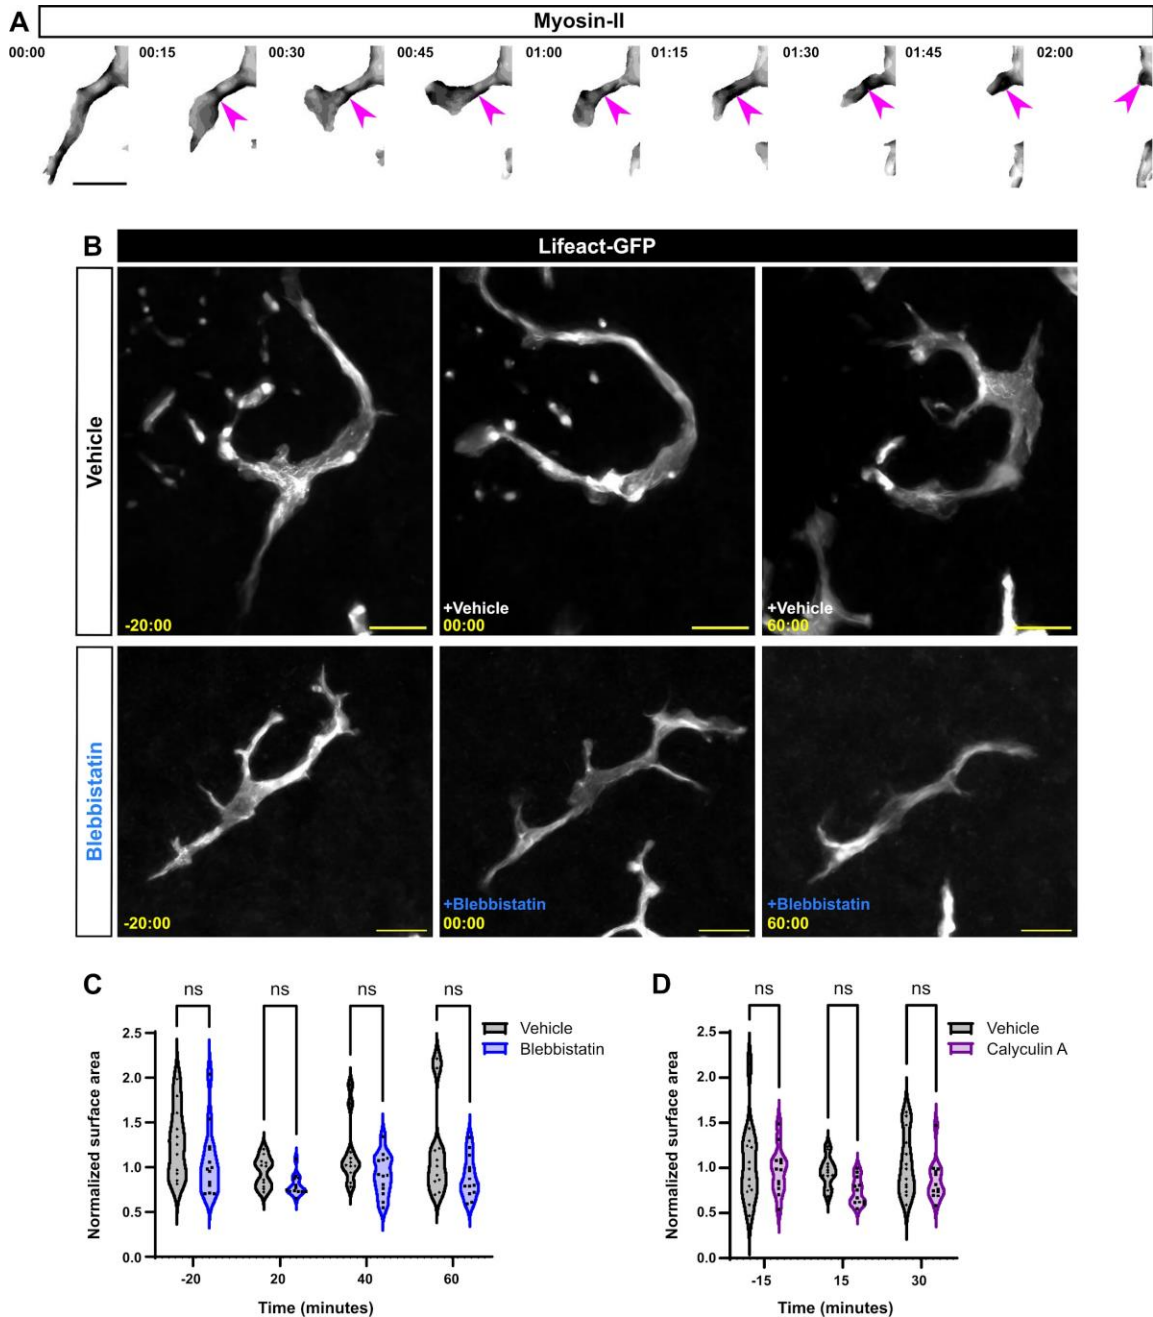

611  
 612 **Supplemental Figure 4. Myosin perturbation and its effects on Langerhans cell shape.** **A.** Stills of macrophage-  
 613 specific myosin (inverted grayscale) during dendrite retraction (see Materials and Methods for details). Magenta  
 614 arrowheads indicate higher levels of myosin during dendrite retraction. **B.** Stills of *Tg(mpeg1:Lifeact-GFP)*-positive  
 615 cells treated with vehicle (**B, top**) or para-amino blebbistatin (**B, bottom**). **C.** Violin plots of Langerhans cell surface  
 616 area, normalized to time of treatment with vehicle or para-amino blebbistatin. Data are representative of two  
 617 individual experiments,  $n = 11$  from  $N = 4$  scales cells for vehicle treatment and  $n = 13$  cells from  $N = 3$  scales for  
 618 blebbistatin treatment. **D.** Violin plots of Langerhans cell surface area, normalized to time of treatment with vehicle or  
 619 Calyculin A. Data are representative of two individual experiments,  $n = 13$  cells from  $N = 6$  scales for vehicle  
 620 treatment and  $n = 12$  cells from  $N = 5$  scales for Calyculin A treatment. Two-way ANOVA followed by Bonferroni post-  
 621 tests revealed no significant differences. Timestamps in **B** denote mm:ss. Scale bars in **(A, B)** denote 10 microns.

622  
 623

624  
625  
626  
627  
628  
629  
630  
631  
632  
633  
634  
635  
636  
637  
638  
639  
640  
641  
642  
643  
644  
645  
646  
647  
648  
649  
650  
651  
652  
653  
654  
655  
656  
657  
658  
659  
660  
661  
662  
663  
664  
665  
666  
667

## SUPPLEMENTAL VIDEO LEGENDS

**Supplemental Video 1.** Time-lapse microscopy of Langerhans cell (cyan) extending and retracting protrusions among epidermal cell membranes (white). Video was bleach-corrected. Scale bar denotes 10 microns.

**Supplemental Video 2.** Time-lapse microscopy of Langerhans cell (cyan) engulfing *Tg(p2rx3a:mCherry)*+ debris (magenta). Scale bar denotes 10 microns.

**Supplemental Video 3.** Time-lapse microscopy of Langerhans cell (white) engulfing cellular debris generated after laser-induced damage of keratinocytes. Yellow asterisk denotes site of ablation. Scale bar denotes 10 microns.

**Supplemental Video 4.** Time-lapse microscopy of Langerhans cell labeled with Lifeact-EGFP. Scale bar denotes 10 microns.

**Supplemental Video 5.** Time-lapse microscopy of Langerhans cell labeled with Lifeact-EGFP (false-colored) engulfing *Tg(p2rx3a:mCherry)*+ debris (white). Scale bar denotes 10 microns.

**Supplemental Video 6.** Time-lapse microscopy of Langerhans cell labeled with Lifeact-EGFP (false-colored) engulfing cellular debris generated after laser-induced damage of keratinocytes. Yellow asterisk indicates site of ablation. Red arrowhead indicates Lifeact-EGFP accumulation during engulfment. Scale bar denotes 10 microns.

**Supplemental Video 7.** Time-lapse microscopy of Langerhans cells (white) treated with vehicle or ROCK inhibitor. Scale bar denotes 20 microns.

**Supplemental Video 8.** Time-lapse microscopy of Langerhans cell (white) engulfing cellular debris generated after laser-induced damage of keratinocytes. Cells are treated with vehicle or ROCK inhibitor. Scale bar denotes 10 microns.

**Supplemental Video 9.** Time-lapse microscopy of Langerhans cells (cyan) reacting to epidermal wounds (epidermal cells labeled in white). Cells are treated with vehicle or ROCK inhibitor. Scale bar denotes 100 microns.
